# Supplementary material for: Structure and genetic variation of the mitochondrial control region in the honey bee Apis mellifera
Source: Springer Nature journal article supplement (doi:10.1007/s13592-014-0341-y), 2015-02-03
Supplement: MOESM1 [file 13592_2014_341_MOESM1_ESM.docx]

**APIDOLOGIE Supplementary Material**

**Structure and genetic variation of the mitochondrial control region in the honey bee *Apis mellifera***

Rita Gonçalves, Ana Isabel Freitas, José Jesus, Pilar De la Rúa, António Brehm*

* Corresponding author, António Brehm, [brehm@uma.pt](mailto:brehm@uma.pt)

Human Genetics Laboratory, University of Madeira, Campus of Penteada, Funchal, Portugal

**Table Legends:**

**Table S1**. Variable positions (including indels) across the complete fragment presented in Figure 1, for 54 individuals analyzed. This file is the direct output from the best alignment obtained using the MEGA 5 software (Tamura et al. 2011) followed by visual inspection

**Table S2**. The same file as in Table S1 but in the fasta format
